# Supplementary material
Source: PubMed Central journal article supplement (PMC8085763)
Supplement: jamaotolaryngolheadnecksurg-e210670-s001.pdf [file jamaotolaryngolheadnecksurg-e210670-s001.pdf]

## Supplemental Online Content

Dicpinigaitis AJ, Kalakoti P, Schmidt M, et al. Associations of baseline frailty status and age with outcomes in patients undergoing vestibular schwannoma resection. *JAMA Otolaryngol Head Neck Surg*. Published online April 29, 2021.  
doi:10.1001/jamaoto.2021.0670

**eTable 1.** Bias Assessment – Comparison of Frailty Stratification between Included and Excluded Patients for Multivariable Analysis

**eTable 2.** Sensitivity Analysis – Significant Associations of Frailty with Clinical Outcome

**eTable 3.** Significant Associations of Frailty with Clinical Outcome – Additional Assessment of Racial Categories

This supplemental material has been provided by the authors to give readers additional information about their work.

**eTable 1: Bias Assessment – Comparison of Frailty Stratification between Included and Excluded Patients for Multivariable Analysis**

| Characteristic                 | Included Patients (n = 22,494) | Excluded Patients (n = 4,818) | P value |
|--------------------------------|--------------------------------|-------------------------------|---------|
| <i>Distribution of Age</i>     |                                |                               |         |
| Age 18-40 years                | 5,056 (22.5)                   | 1,227 (25.5)                  | 0.126   |
| Age 40-60 years                | 12,186 (54.2)                  | 2,595 (53.9)                  |         |
| Age 60-80 years                | 5,084 (22.6)                   | 957 (19.9)                    |         |
| Age 80+ years                  | 168 (0.7)                      | 39 (0.8)                      |         |
| <i>Distribution of Frailty</i> |                                |                               |         |
| Robust (mFI = 0)               | 12,311 (54.7)                  | 2,779 (57.7)                  | 0.404   |
| Pre-Frail (mFI = 1)            | 6,811 (30.3)                   | 1,393 (28.9)                  |         |
| Frail (mFI = 2)                | 2,549 (11.3)                   | 474 (9.8)                     |         |
| Severely Frail (mFI ≥ 3)       | 824 (3.7)                      | 173 (3.6)                     |         |

Values presented as n (%) for categorical data (compared by chi-square test). Excluded Patients lacked documentation of race. Statistical significance evaluated at  $p < 0.05$ .

**eTable 2: Sensitivity Analysis – Significant Associations of Frailty with Clinical Outcome**

| Clinical Outcome      | Model 1               | OR (95% CI)        | P value             | Model 2                                             | OR (95% CI)       | P value            | Model 3               | OR (95% CI)        | P value            |
|-----------------------|-----------------------|--------------------|---------------------|-----------------------------------------------------|-------------------|--------------------|-----------------------|--------------------|--------------------|
| In-Hospital Mortality | Age                   | 1.01 (0.94, 1.07)  | 0.873               | Age                                                 | 1.02 (0.96, 1.08) | 0.542              | Age                   | 1.03 (0.61, 1.73)  | 0.918              |
|                       | Female                | 0.55 (0.18, 1.72)  | 0.307               | Female                                              | 0.58 (0.18, 1.82) | 0.347              | Female                | 0.50 (0.02, 10.30) | 0.652              |
|                       | Non-White Race        | 3.04 (1.00, 9.26)  | 0.050               | Non-White Race                                      | 2.80 (0.90, 8.73) | 0.075              | Non-White Race        | 2.44 (0.17, 34.39) | 0.508              |
|                       | <b>mFI</b>            | 6.27 (1.23, 31.96) | <b>0.027*</b>       | <b>mFI</b><br>(reference: Severely Frail (mFI ≥ 3)) |                   | <b>0.001*</b>      | <b>mFI</b>            | 2.28 (1.68, 3.11)  | <b>&lt; 0.001*</b> |
|                       |                       |                    | Robust (mFI = 0)    | 0.04 (0.01, 0.24)                                   |                   |                    |                       |                    |                    |
|                       |                       |                    | Pre-Frail (mFI = 1) | 0.14 (0.04, 0.49)                                   |                   |                    |                       |                    |                    |
|                       |                       |                    | Frail (mFI = 2)     | 0.38 (0.09, 1.67)                                   |                   |                    |                       |                    |                    |
| Routine Discharge     | <b>Age</b>            | 1.02 (1.01, 1.03)  | <b>&lt; 0.001*</b>  | <b>Age</b>                                          | 1.02 (1.01, 1.03) | <b>&lt; 0.001*</b> | Age                   | 1.04 (0.98, 1.11)  | 0.192              |
|                       | <b>Female</b>         | 0.75 (0.64, 0.88)  | <b>&lt; 0.001*</b>  | <b>Female</b>                                       | 0.74 (0.63, 0.87) | <b>&lt; 0.001*</b> | Female                | 0.78 (0.55, 1.11)  | 0.173              |
|                       | <b>Non-White Race</b> | 0.61 (0.50, 0.74)  | <b>&lt; 0.001*</b>  | <b>Non-White Race</b>                               | 0.62 (0.51, 0.75) | <b>&lt; 0.001*</b> | <b>Non-White Race</b> | 0.54 (0.39, 0.75)  | <b>&lt; 0.001*</b> |
|                       | <b>mFI</b>            | 0.47 (0.40, 0.55)  | <b>&lt; 0.001*</b>  | <b>mFI</b><br>(reference: Severely Frail (mFI ≥ 3)) |                   | <b>&lt; 0.001*</b> | <b>mFI-11</b>         | 0.60 (0.55, 0.67)  | <b>&lt; 0.001*</b> |
|                       |                       |                    |                     | Robust (mFI = 0)                                    | 4.65 (3.30, 6.54) |                    |                       |                    |                    |

|                                                                 |                       |                   |                    |                                                     |                      |                    |                       |                   |                    |
|-----------------------------------------------------------------|-----------------------|-------------------|--------------------|-----------------------------------------------------|----------------------|--------------------|-----------------------|-------------------|--------------------|
|                                                                 |                       |                   |                    | Pre-Frail<br>(mFI = 1)                              | 2.62 (1.89,<br>3.62) |                    |                       |                   |                    |
|                                                                 |                       |                   |                    | Frail<br>(mFI = 2)                                  | 1.71 (1.20,<br>2.43) |                    |                       |                   |                    |
| Hospital Length of Stay (> 75 <sup>th</sup> Percentile, 6 days) |                       |                   |                    |                                                     |                      |                    |                       |                   |                    |
|                                                                 | Age                   | 1.00 (0.99, 1.01) | 0.238              | Age                                                 | 1.01 (1.00, 1.01)    | 0.062              | Age                   | 0.98 (0.92, 1.03) | 0.393              |
|                                                                 | Female                | 1.03 (0.89, 1.20) | 0.679              | Female                                              | 1.04 (0.89, 1.20)    | 0.587              | Female                | 1.06 (0.77, 1.47) | 0.714              |
|                                                                 | <b>Non-White Race</b> | 1.72 (1.43, 2.07) | <b>&lt; 0.001*</b> | <b>Non-White Race</b>                               | 1.69 (1.41, 2.04)    | <b>&lt; 0.001*</b> | <b>Non-White Race</b> | 2.03 (1.53, 2.71) | <b>&lt; 0.001*</b> |
|                                                                 | <b>mFI</b>            | 2.07 (1.75, 2.45) | <b>&lt; 0.001*</b> | <b>mFI</b><br>(reference: Severely Frail (mFI ≥ 3)) |                      | <b>&lt; 0.001*</b> | <b>mFI</b>            | 1.48 (1.35, 1.62) | <b>&lt; 0.001*</b> |
|                                                                 |                       |                   |                    | Robust (mFI = 0)                                    | 0.25 (0.18, 0.35)    |                    |                       |                   |                    |
|                                                                 |                       |                   |                    | Pre-Frail (mFI = 1)                                 | 0.45 (0.32, 0.63)    |                    |                       |                   |                    |
|                                                                 |                       |                   |                    | Frail (mFI = 2)                                     | 0.62 (0.43, 0.90)    |                    |                       |                   |                    |

Significant associations of age (continuous parameter), female sex, non-White race, and mFI-11 with clinical outcome evaluated using complex samples multivariable logistic regression models. Model 1 – mFI as binary parameter (robust (mFI = 0) in comparison to frail (mFI ≥ 1)). Model 2 – mFI as categorical parameter (robust (mFI = 0), pre-frail (mFI = 1), frail (mFI = 2), and severely frail (mFI ≥ 3)). Model 3 – propensity score matching assessment of mFI as continuous parameter to account residual confounding by age (matching parameters included age, female sex, and race for frailty as a binary variable defined previously). Values reported as odds ratios (OR) with 95% confidence intervals (CI). \*Denotes statistical significance following Bonferroni correction for multiple comparisons.

**eTable 3: Significant Associations of Frailty with Clinical Outcome – Additional Assessment of Racial Categories**

| Clinical Outcome                                                | Parameters                     | OR (95% CI)        | <i>P</i> value     |
|-----------------------------------------------------------------|--------------------------------|--------------------|--------------------|
| In-Hospital Mortality                                           |                                |                    |                    |
|                                                                 | Age                            | 1.01 (0.96, 1.08)  | 0.538              |
|                                                                 | Female                         | 1.81 (0.56, 5.85)  | 0.327              |
|                                                                 | <b>mFI</b>                     | 2.33 (1.69, 3.22)  | <b>&lt; 0.001*</b> |
|                                                                 | <b>Race</b> (reference: Other) |                    | <b>&lt; 0.001*</b> |
|                                                                 | White                          | 0.39 (0.05, 3.13)  |                    |
|                                                                 | Black                          | 1.65 (0.14, 19.23) |                    |
|                                                                 | Hispanic                       | 1.15 (0.10, 13.51) |                    |
|                                                                 | Asian or Pacific Islander      | 1.09 (0.07, 17.86) |                    |
|                                                                 | Native American                | -                  |                    |
| Routine Discharge                                               |                                |                    |                    |
|                                                                 | <b>Age</b>                     | 1.02 (1.01, 1.03)  | <b>&lt; 0.001*</b> |
|                                                                 | <b>Female</b>                  | 0.74 (0.63, 0.87)  | <b>&lt; 0.001*</b> |
|                                                                 | <b>mFI</b>                     | 0.61 (0.55, 0.66)  | <b>&lt; 0.001*</b> |
|                                                                 | <b>Race</b> (reference: Other) |                    | <b>0.002*</b>      |
|                                                                 | White                          | 0.55 (0.39, 0.77)  |                    |
|                                                                 | Black                          | 0.82 (0.52, 1.30)  |                    |
|                                                                 | Hispanic                       | 0.90 (0.58, 1.40)  |                    |
|                                                                 | Asian or Pacific Islander      | 0.90 (0.56, 1.43)  |                    |
|                                                                 | Native American                | 0.44 (0.11, 1.85)  |                    |
| Hospital Length of Stay (> 75 <sup>th</sup> Percentile, 6 days) |                                |                    |                    |
|                                                                 | Age                            | 1.01 (0.99, 1.02)  | 0.110              |
|                                                                 | Female                         | 1.04 (0.89, 1.21)  | 0.631              |
|                                                                 | mFI                            | 1.54 (1.41, 1.68)  | <b>&lt; 0.001*</b> |
|                                                                 | Race (reference: Other)        |                    | 0.374              |
|                                                                 | White                          | 0.70 (0.47, 1.04)  |                    |
|                                                                 | Black                          | 0.92 (0.56, 1.51)  |                    |
|                                                                 | Hispanic                       | 1.42 (0.90, 2.25)  |                    |
|                                                                 | Asian or Pacific Islander      | 1.34 (0.83, 2.29)  |                    |

|  |                 |                   |  |
|--|-----------------|-------------------|--|
|  | Native American | 0.99 (0.28, 3.53) |  |
|--|-----------------|-------------------|--|

Significant associations of age (continuous parameter), female sex, race (categorical variable - White, Black, Hispanic, Asian or Pacific Islander, Native America, and Other Race), and mFI-11 (continuous parameter) with clinical outcome evaluated using complex samples multivariable logistic regression models. Values reported as odds ratios (OR) with 95% confidence intervals (CI). \*Denotes statistical significance following Bonferroni correction for multiple comparisons.
